# Supplementary material for: Platinum-Based Interdigitated Micro-Electrode Arrays for Reagent-Free Detection of Copper
Source: MDPI journal article supplement (doi:10.3390/s21103544), 2021-05-19
Supplement: s1 [file s1]

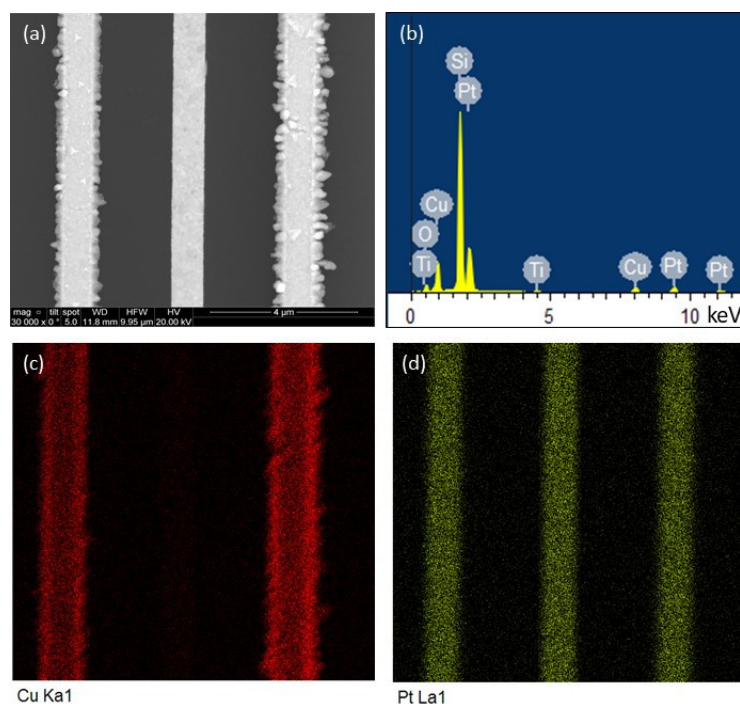

**Figure 1.** (a) SEM micrograph of the sensor after deposition of Cu from a 100 μg/L solution (prior to stripping); The microbands on the left and on the right are part of the sensing comb while the microband in the middle is part of the protonator (b), EDX spectrum of the sample, showing Cu peaks at 1 and 8 keV; EDX mapping analysis showing (c) Cu and (d) Pt contributions.
